# Supplementary material for: Pathway of zinc oxide formation by seed-assisted and controlled double-jet precipitation
Source: Royal Society of Chemistry journal article supplement (doi:10.1039/c5ce01916h), 2015-12-22
Supplement: c5ce01916h1.pdf [file c5ce01916h1.pdf]

**Supporting Information**

**Pathway of Zinc Oxide Formation by Seed-Assisted  
and Controlled Double-Jet Precipitation**

Xu Yan <sup>a</sup>, Liyuan Chai <sup>a,b</sup>, Qingzhu Li <sup>a,b,\*</sup>, Lijun Ye <sup>a</sup>, Bentao Yang <sup>a</sup>, Qingwei Wang <sup>a,b</sup>

<sup>a</sup> School of Metallurgy and Environment, Central South University, Changsha 410083, China

<sup>b</sup> Chinese National Engineering Research Center for Control & Treatment of Heavy Metal Pollution, Changsha 410083, China

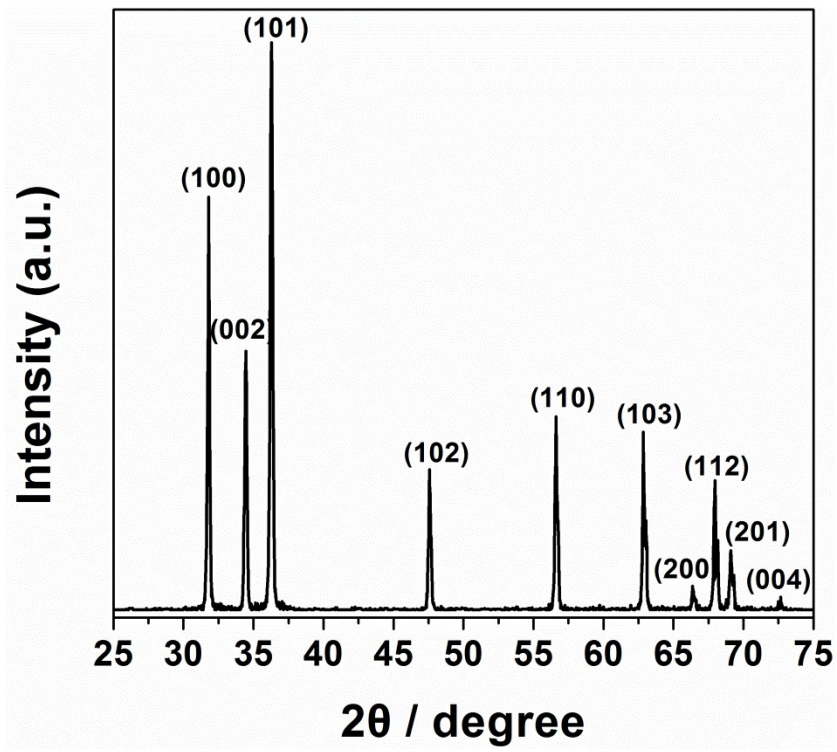

Figure S1 XRD pattern of ZnO seeds

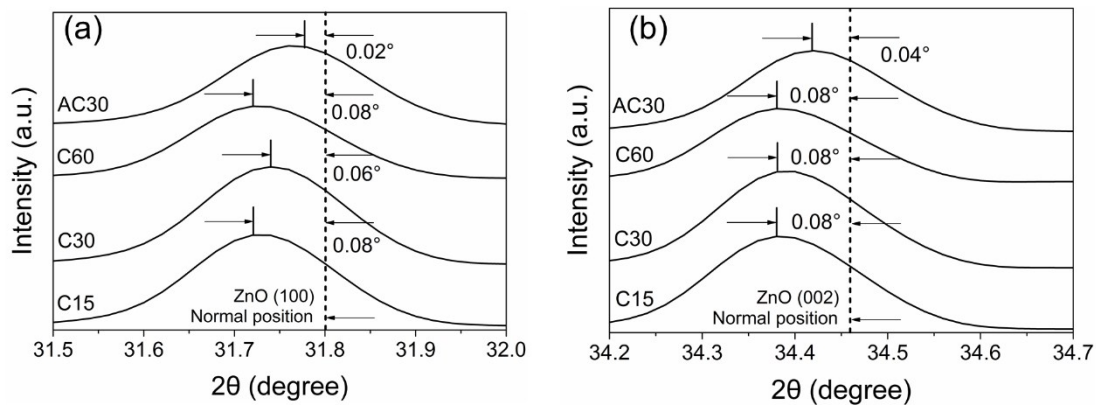

**Figure S2 Enlarged ZnO (100) (a) and (002) (b) diffraction peaks of samples**

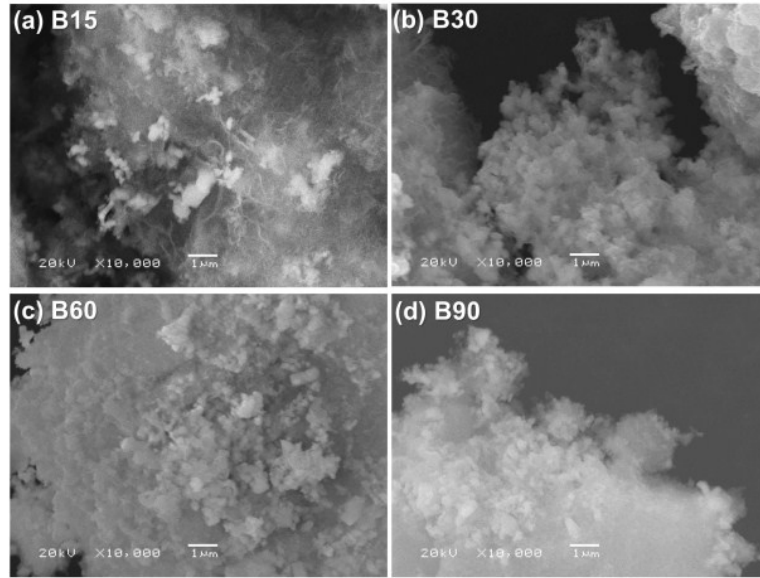

**Figure S3 SEM images of control samples**

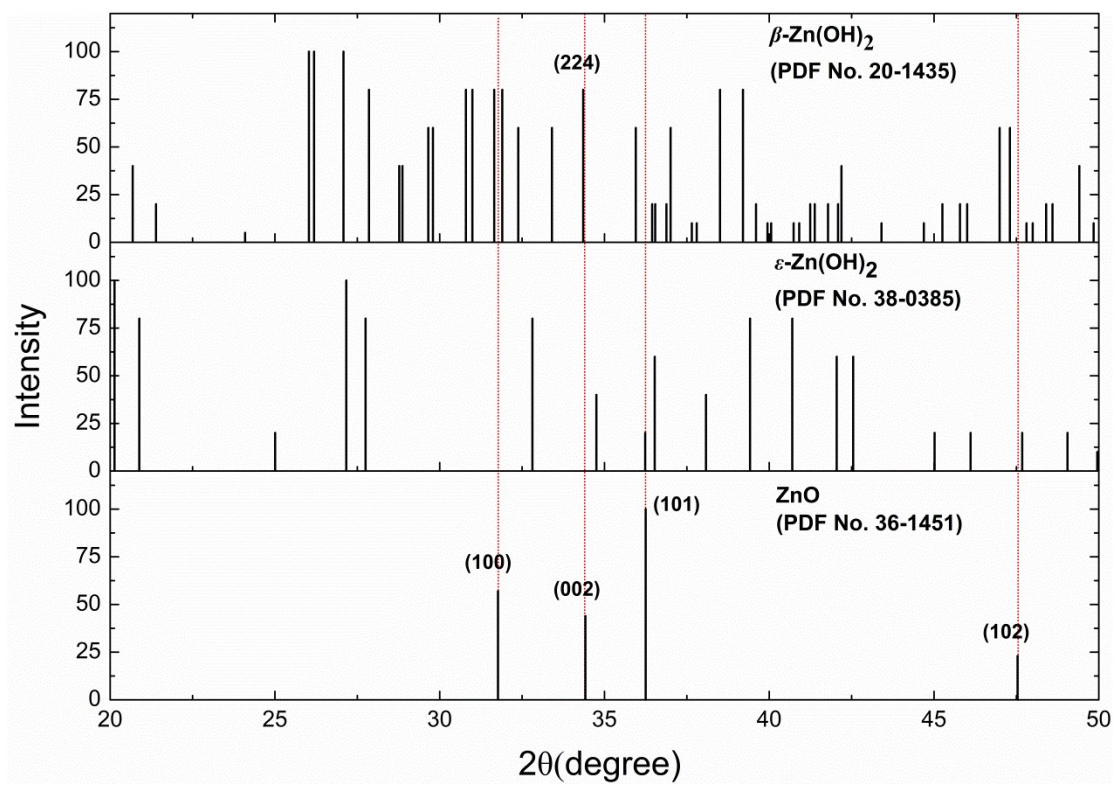

Figure S4 Reference XRD patterns for ZnO,  $\epsilon$ -Zn(OH)<sub>2</sub>, and  $\beta$ -Zn(OH)<sub>2</sub>

**Table S1 Thermodynamic data of Zn-OH species (1 atm, 25 °C)**

| Species                                           | $\Delta_f G^\circ$ (kJ mol <sup>-1</sup> ) | $\Delta_f H^\circ$ (kJ mol <sup>-1</sup> ) | $S^\circ$ (J deg <sup>-1</sup> mol <sup>-1</sup> ) |
|---------------------------------------------------|--------------------------------------------|--------------------------------------------|----------------------------------------------------|
| H <sub>2</sub> O <sup>a</sup>                     | -237.14                                    | -285.83                                    | 69.95                                              |
| OH <sup>-a</sup>                                  | -157.28                                    | -230.02                                    | -10.90                                             |
| Zn <sup>2+a</sup>                                 | -147.10                                    | -153.39                                    | -109.8                                             |
| ZnO (cr) <sup>a</sup>                             | -320.52                                    | -350.46                                    | 43.65                                              |
| $\epsilon$ -Zn(OH) <sub>2</sub> (cr) <sup>a</sup> | -555.13                                    | -639.06                                    | 81.59                                              |
| $\beta$ -Zn(OH) <sub>2</sub> (cr) <sup>a</sup>    | -553.17                                    | -641.91                                    | 81.17                                              |

<sup>a</sup> Quoted from Ref. <sup>1</sup>

**Table S2 Thermodynamic data of reaction for ZnO formation (1 atm, 25 °C)**

| No. | Reaction                                                                                | $\Delta_r G^\circ$<br>(kJ mol <sup>-1</sup> ) | $\Delta_r H^\circ$<br>(kJ mol <sup>-1</sup> ) | $\Delta_r S^\circ$<br>(J deg <sup>-1</sup> mol <sup>-1</sup> ) |
|-----|-----------------------------------------------------------------------------------------|-----------------------------------------------|-----------------------------------------------|----------------------------------------------------------------|
| 1   | Zn <sup>2+</sup> + 2OH <sup>-</sup> = $\epsilon$ -Zn(OH) <sub>2</sub> (cr) <sup>a</sup> | -93.47<br>(-59.45 <sup>b</sup> )              | -25.63                                        | 213.19                                                         |
| 2   | Zn <sup>2+</sup> + 2OH <sup>-</sup> = $\beta$ -Zn(OH) <sub>2</sub> (cr) <sup>a</sup>    | -91.51<br>(-57.49 <sup>b</sup> )              | -28.48                                        | 212.77                                                         |
| 3   | $\epsilon$ -Zn(OH) <sub>2</sub> (cr) = $\beta$ -Zn(OH) <sub>2</sub> (cr)                | 1.96                                          | -2.85                                         | -0.42                                                          |
| 4   | $\epsilon$ -Zn(OH) <sub>2</sub> (cr) = ZnO (cr) + H <sub>2</sub> O                      | -2.53                                         | 2.77                                          | 32.01                                                          |
| 5   | $\beta$ -Zn(OH) <sub>2</sub> (cr) = ZnO (cr) + H <sub>2</sub> O                         | -4.49                                         | 5.62                                          | 32.43                                                          |

<sup>a</sup>  $K_{sp}$ = $3.5 \times 10^{-17}$  at 25 °C <sup>2</sup>

<sup>b</sup> Data calculated under the state that the first drop of Zn<sup>2+</sup> solution was added.

## References

1. J. A. Dean, *Lange's Handbook of Chemistry*, McGraw-Hill, New York, 1979.
2. A. Moezzi, M. Cortie and A. McDonagh, *Dalton T.*, 2011, **40**, 4871.
